# Supplementary material for: Peripherin-2 and Rom-1 have opposing effects on rod outer segment targeting of retinitis pigmentosa-linked peripherin-2 mutants
Source: PubMed Central journal article supplement (PMC5443838; doi:10.1038/s41598-017-02514-5), 2017-05-24
Supplement: 41598_2017_2514_MOESM1_ESM.pdf [file 41598_2017_2514_MOESM1_ESM.pdf]

**Peripherin-2 and Rom-1 have opposing effects on rod outer segment targeting of retinitis pigmentosa-linked peripherin-2 mutants**

**Sybille Böhm<sup>1,2#</sup>, Lisa M. Riedmayr<sup>1,2#</sup>, O.N. Phuong Nguyen<sup>1,2</sup>, Andreas Gießl<sup>3</sup>, Toni Liebscher<sup>1,2</sup>, Elisabeth S. Butz<sup>1,2</sup>, Christian Schön<sup>1,2</sup>, Stylianos Michalakis<sup>1,2</sup>, Christian Wahl-Schott<sup>1,2</sup>, Martin Biel<sup>1,2</sup> and Elvir Becirovic<sup>1,2\*</sup>**

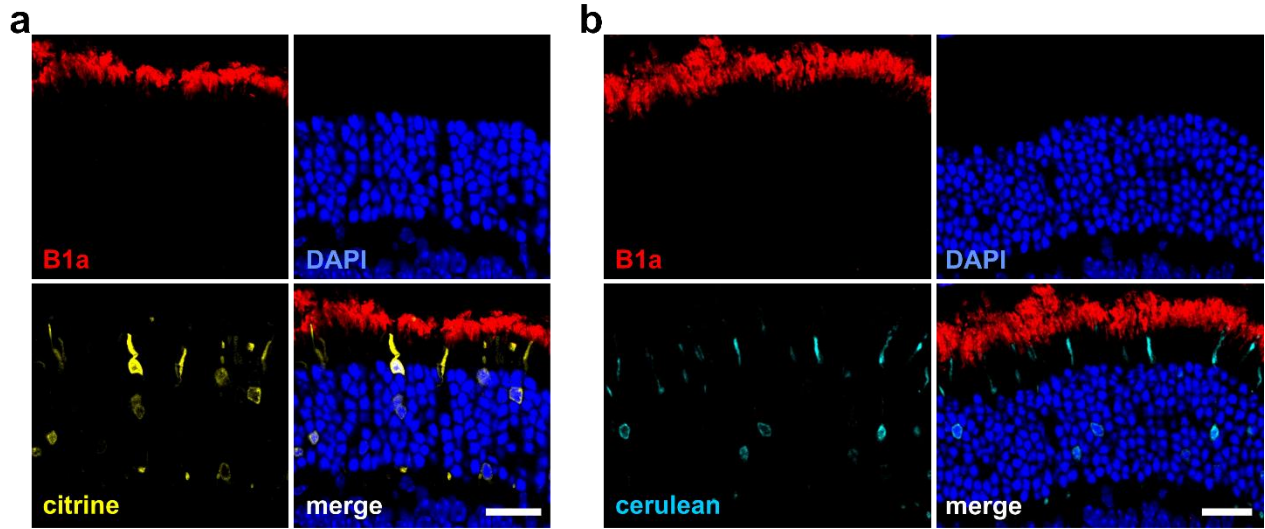

**Supplementary Figure 1: Expression profile of citrine and cerulean in transduced photoreceptors. Scale bar, 30  $\mu$ m.**

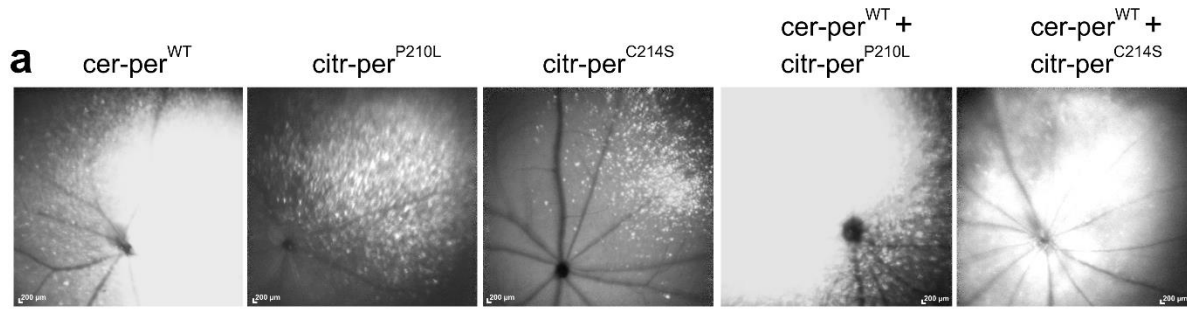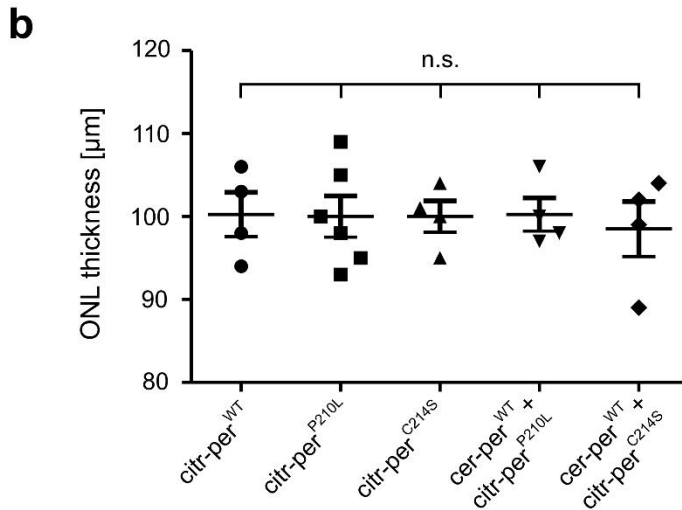

**Supplementary Figure 2: Long-term effects of per<sup>WT</sup> and per<sup>MT</sup> expression on retinal degeneration in transduced murine photoreceptors.** A, Representative confocal scanning laser ophthalmoscopy (cSLO) of mice injected with the single constructs as indicated. Note that, in contrast to the confocal microscope settings, citrine and cerulean fluorescence (white signal) cannot be distinguished using cSLO. B, measurements of the outer nuclear layer (ONL) thickness of injected animals using optical coherence tomography. The single values are as follows: citr-per<sup>WT</sup> (n=4) 100.3 ± 2.7 μm; citr-per<sup>P210L</sup> (n=6) 100.0 ± 2.5 μm; citr-per<sup>C214S</sup> (n=4) 100.0 ± 1.9 μm; citr-per<sup>WT</sup> + citr-per<sup>P210L</sup> (n=4) 100.3 ± 2.0 μm; citr-per<sup>WT</sup> + citr-per<sup>C214S</sup> (n=4) 98.5 ± 3.3 μm. Statistical analysis was done with one-way ANOVA followed by the Tukey's test for multiple comparisons. n.s., not significant.

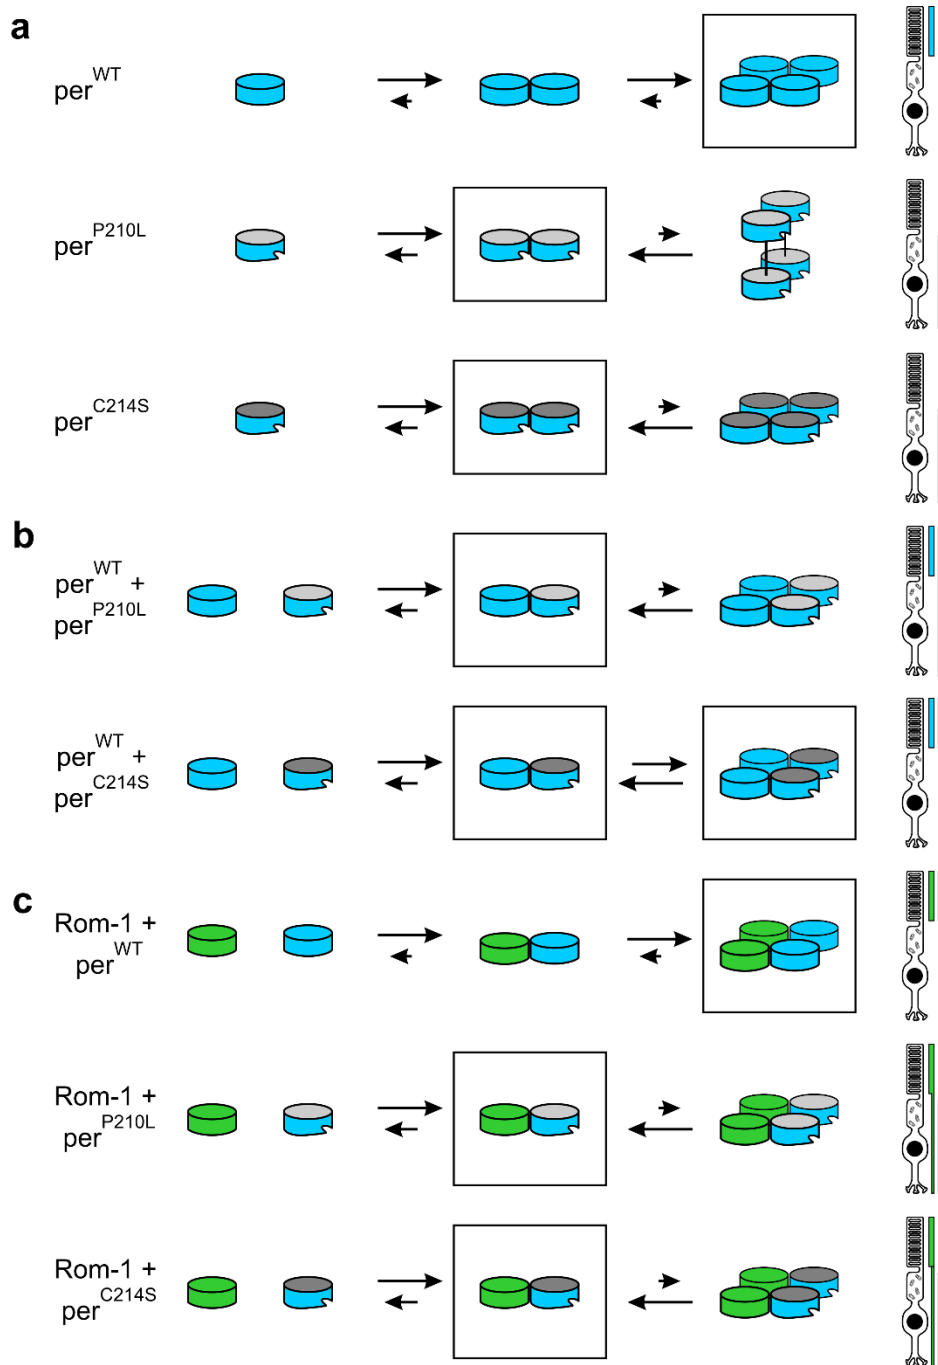

**Supplementary Figure 3: Tentative model of  $per^{MT}$  protein assembly and rod OS targeting in presence or absence of transgenic  $per^{WT}$  and Rom-1.** For reasons of clarity, octamers, higher-order oligomers, and aggregates are not included in this model. The rectangle highlights the major SDGC fraction(s) for the single homo- or heterogenic interactions and the arrow length correlates with the preferential direction within the equilibrium. The misfolding of the distal part of the D2 loop caused by both mutants is symbolized by an incision. The localization of the respective constructs in rod photoreceptors (right panel) is indicated by colored bars symbolizing color-coded  $per^{WT}$ ,  $per^{MT}$ , or Rom-1 constructs. The bar thickness represents the estimated relative amount of the detected constructs in the respective compartment.

Supplementary Table 1: FRET measurements from HEK293T cells and from isolated rod OS.

|                        | HEK293T |          |          |             |             |         |             | rod OS      |       |          |          |
|------------------------|---------|----------|----------|-------------|-------------|---------|-------------|-------------|-------|----------|----------|
|                        | WT-WT   | WT-P210L | WT-C214S | P210L-P210L | C214S-C214S | WT-ROM1 | ROM-1-P210L | ROM-1-C214S | WT-WT | WT-P210L | WT-C214S |
| $E_{Amax}$             | 34.2    | 9.44     | 8.58     | 30.7        | 26.47       | 15.64   | 6.58        | 6.32        | 25.96 | 37.12    | 26.47    |
| % of WT-WT or WT-ROM-1 |         | 28       | 25       | 90          | 77          |         | 42          | 40          |       | 143      | 102      |
| n                      | 53      | 53       | 50       | 53          | 54          | 48      | 48          | 48          | 45    | 32       | 44       |

**Supplementary Table 2: Quantification of the SDGC experiments. Values are given as mean values  $\pm$  SEM.**

|                |                                | Immunoreactivity (% of Total) |                 |                  |                  |                  |                  |                  |                  |                  |                   |                   |                   |
|----------------|--------------------------------|-------------------------------|-----------------|------------------|------------------|------------------|------------------|------------------|------------------|------------------|-------------------|-------------------|-------------------|
|                |                                | Fraction                      |                 |                  |                  |                  |                  |                  |                  |                  |                   |                   |                   |
|                |                                |                               | 1               | 2                | 3                | 4                | 5                | 6                | 7                | 8                | 9                 | 10                | 11                |
| n = 3          | WT                             | Non-covalent                  | 0.00            | 0.00             | 0.00             | 2.78 $\pm$ 2.78  | 9.33 $\pm$ 0.71  | 11.53 $\pm$ 1.38 | 11.70 $\pm$ 2.15 | 10.98 $\pm$ 2.06 | 2.65 $\pm$ 2.65   | 2.76 $\pm$ 2.76   | 1.68 $\pm$ 1.68   |
|                |                                | Disulfide bond                | 0.00            | 2.05 $\pm$ 2.05  | 4.73 $\pm$ 2.39  | 7.97 $\pm$ 1.60  | 11.78 $\pm$ 1.26 | 12.46 $\pm$ 1.50 | 7.61 $\pm$ 0.57  | 0.00             | 0.00              | 0.00              | 0.00              |
| n = 4          | P210L                          | Non-covalent                  | 0.00            | 0.00             | 0.00             | 0.00             | 0.00             | 0.00             | 0.00             | 0.00             | 2.10 $\pm$ 2.10   | 20.35 $\pm$ 4.66  | 19.00 $\pm$ 6.53  |
|                |                                | Disulfide bond                | 0.00            | 0.00             | 0.00             | 0.00             | 2.86 $\pm$ 2.86  | 5.44 $\pm$ 3.16  | 4.81 $\pm$ 2.79  | 5.78 $\pm$ 2.13  | 2.67 $\pm$ 2.67   | 1.78 $\pm$ 1.78   | 0.00              |
|                |                                | Aggregate                     | 0.00            | 0.00             | 2.08 $\pm$ 2.08  | 8.28 $\pm$ 3.17  | 10.83 $\pm$ 1.53 | 8.80 $\pm$ 3.07  | 3.18 $\pm$ 2.67  | 2.02 $\pm$ 1.78  | 0.00              | 0.00              | 0.00              |
| n = 3          | C214S                          | Non-covalent                  | 0.00            | 0.00             | 0.00             | 0.00             | 2.61 $\pm$ 2.61  | 4.36 $\pm$ 4.36  | 3.42 $\pm$ 3.42  | 3.34 $\pm$ 3.34  | 18.23 $\pm$ 13.07 | 27.29 $\pm$ 14.59 | 5.20 $\pm$ 5.20   |
|                |                                | Aggregate                     | 7.28 $\pm$ 3.77 | 7.65 $\pm$ 4.20  | 5.27 $\pm$ 5.27  | 4.03 $\pm$ 4.03  | 6.78 $\pm$ 6.78  | 4.53 $\pm$ 4.53  | 0.00             | 0.00             | 0.00              | 0.00              | 0.00              |
| n = 5          | P210L + WT<br>IB: anti-myc     | Non-covalent                  | 0.00            | 1.74 $\pm$ 1.74  | 2.84 $\pm$ 2.84  | 3.13 $\pm$ 3.13  | 5.13 $\pm$ 3.15  | 4.33 $\pm$ 2.80  | 2.07 $\pm$ 2.07  | 4.45 $\pm$ 2.73  | 23.39 $\pm$ 4.14  | 27.42 $\pm$ 5.71  | 12.38 $\pm$ 5.53  |
|                |                                | Disulfide bond                | 0.00            | 0.00             | 0.00             | 0.00             | 0.00             | 0.00             | 0.00             | 0.00             | 0.00              | 0.00              | 0.00              |
|                |                                | Aggregate                     | 0.00            | 1.36 $\pm$ 1.36  | 0.00             | 2.01 $\pm$ 1.27  | 3.57 $\pm$ 2.37  | 3.94 $\pm$ 2.49  | 2.23 $\pm$ 2.23  | 0.00             | 0.00              | 0.00              | 0.00              |
|                | P210L + WT<br>IB: anti-flag    | Non-covalent                  | 0.00            | 0.00             | 0.00             | 0.00             | 2.37 $\pm$ 2.37  | 1.85 $\pm$ 1.85  | 9.13 $\pm$ 1.95  | 11.07 $\pm$ 4.26 | 10.79 $\pm$ 5.76  | 11.68 $\pm$ 3.67  | 0.00              |
| Disulfide bond |                                | 3.68 $\pm$ 3.68               | 4.67 $\pm$ 4.67 | 6.60 $\pm$ 3.45  | 7.86 $\pm$ 4.13  | 12.61 $\pm$ 0.59 | 11.95 $\pm$ 2.62 | 3.35 $\pm$ 3.35  | 2.40 $\pm$ 2.40  | 0.00             | 0.00              | 0.00              |                   |
| n = 4          | C214S + WT<br>IB: anti-myc     | Non-covalent                  | 0.00            | 0.00             | 0.00             | 0.00             | 4.45 $\pm$ 2.64  | 5.22 $\pm$ 3.09  | 5.91 $\pm$ 3.74  | 16.61 $\pm$ 3.49 | 12.33 $\pm$ 4.41  | 20.32 $\pm$ 4.78  | 19.65 $\pm$ 10.11 |
|                |                                | Aggregate                     | 0.00            | 0.00             | 5.87 $\pm$ 3.60  | 7.81 $\pm$ 2.74  | 1.82 $\pm$ 1.82  | 0.00             | 0.00             | 0.00             | 0.00              | 0.00              | 0.00              |
|                | C214S + WT<br>IB: anti-flag    | Non-covalent                  | 0.00            | 0.00             | 0.00             | 0.00             | 1.45 $\pm$ 1.45  | 1.67 $\pm$ 1.12  | 5.95 $\pm$ 1.39  | 3.40 $\pm$ 1.90  | 6.41 $\pm$ 0.57   | 7.52 $\pm$ 0.92   | 4.11 $\pm$ 4.11   |
|                |                                | Disulfide bond                | 5.51 $\pm$ 2.76 | 8.75 $\pm$ 1.12  | 10.40 $\pm$ 0.57 | 11.06 $\pm$ 0.38 | 11.38 $\pm$ 0.63 | 9.58 $\pm$ 0.63  | 7.24 $\pm$ 0.64  | 3.46 $\pm$ 1.90  | 2.11 $\pm$ 2.11   | 0.00              | 0.00              |
| n = 3          | WT + Rom-1<br>IB: anti-myc     | Non-covalent                  | 0.00            | 0.00             | 0.00             | 0.00             | 8.22 $\pm$ 0.86  | 10.20 $\pm$ 1.46 | 6.34 $\pm$ 3.17  | 4.70 $\pm$ 4.70  | 2.77 $\pm$ 2.77   | 0.00              | 0.00              |
|                |                                | Disulfide bond                | 8.48 $\pm$ 4.42 | 10.61 $\pm$ 1.81 | 10.18 $\pm$ 1.60 | 9.69 $\pm$ 1.87  | 10.50 $\pm$ 2.20 | 10.41 $\pm$ 1.38 | 7.92 $\pm$ 0.20  | 0.00             | 0.00              | 0.00              | 0.00              |
|                | WT + Rom-1<br>IB: anti-flag    | Non-covalent                  | 0.00            | 0.00             | 0.00             | 1.45 $\pm$ 1.45  | 5.40 $\pm$ 2.89  | 14.96 $\pm$ 2.60 | 17.61 $\pm$ 1.74 | 18.26 $\pm$ 9.93 | 19.35 $\pm$ 3.61  | 8.99 $\pm$ 5.91   | 3.61 $\pm$ 3.61   |
|                |                                | Disulfide bond                | 0.00            | 0.00             | 0.00             | 0.00             | 3.49 $\pm$ 1.85  | 4.55 $\pm$ 2.65  | 2.33 $\pm$ 2.33  | 0.00             | 0.00              | 0.00              | 0.00              |
| n = 3          | P210L + Rom-1<br>IB: anti-myc  | Non-covalent                  | 0.00            | 0.00             | 0.00             | 0.00             | 0.00             | 0.00             | 0.00             | 4.56 $\pm$ 4.56  | 22.76 $\pm$ 2.11  | 31.48 $\pm$ 6.45  | 28.67 $\pm$ 9.40  |
|                |                                | Disulfide bond                | 0.00            | 0.00             | 0.00             | 0.00             | 0.00             | 0.00             | 0.00             | 0.00             | 0.00              | 0.00              | 0.00              |
|                |                                | Aggregate                     | 0.00            | 5.60 $\pm$ 5.60  | 0.00             | 0.00             | 5.01 $\pm$ 5.01  | 1.93 $\pm$ 1.93  | 0.00             | 0.00             | 0.00              | 0.00              | 0.00              |
|                | P210L + Rom-1<br>IB: anti-flag | Non-covalent                  | 0.00            | 0.00             | 0.00             | 0.00             | 0.00             | 0.00             | 0.00             | 0.00             | 19.68 $\pm$ 9.84  | 43.50 $\pm$ 2.28  | 36.82 $\pm$ 12.12 |
| Disulfide bond |                                | 0.00                          | 0.00            | 0.00             | 0.00             | 0.00             | 0.00             | 0.00             | 0.00             | 0.00             | 0.00              | 0.00              |                   |
| n = 3          | C214S + Rom-1<br>IB: anti-myc  | Non-covalent                  | 0.00            | 0.00             | 0.00             | 0.00             | 0.00             | 4.59 $\pm$ 4.59  | 4.91 $\pm$ 4.91  | 0.00             | 29.00 $\pm$ 2.51  | 31.53 $\pm$ 3.67  | 24.34 $\pm$ 3.41  |
|                |                                | Aggregate                     | 0.00            | 0.00             | 0.00             | 0.00             | 5.64 $\pm$ 5.64  | 0.00             | 0.00             | 0.00             | 0.00              | 0.00              | 0.00              |
|                | C214S + Rom-1<br>IB: anti-flag | Non-covalent                  | 0.00            | 0.00             | 0.00             | 0.00             | 0.00             | 0.00             | 0.00             | 2.43 $\pm$ 2.43  | 28.57 $\pm$ 6.38  | 26.46 $\pm$ 2.94  | 21.20 $\pm$ 2.41  |
|                |                                | Disulfide bond                | 0.00            | 0.00             | 0.00             | 0.00             | 0.00             | 0.00             | 1.75 $\pm$ 1.75  | 6.79 $\pm$ 4.15  | 10.18 $\pm$ 0.14  | 2.60 $\pm$ 2.60   | 0.00              |
